# Supplementary material
Source: PubMed Central journal article supplement (PMC1326184)

**A**

|          | helper DNA_1              | helper DNA_2              |
|----------|---------------------------|---------------------------|
| BA site1 | AGGCGGCGGGCAGGTGTGGGCGGCG | GAGCAGCAGCTGTTGCCGAGGCCGT |
| BA site2 | TTGTGGGGTCCGTACATGCAACGAT | CGGCATGGTGACCGTAGCACTACCT |
| BA site3 | ACTTCTAGGAGTGGCTCGCGCCGAT | GCACGCACTGTAATTCCTCTTCGAC |

**B**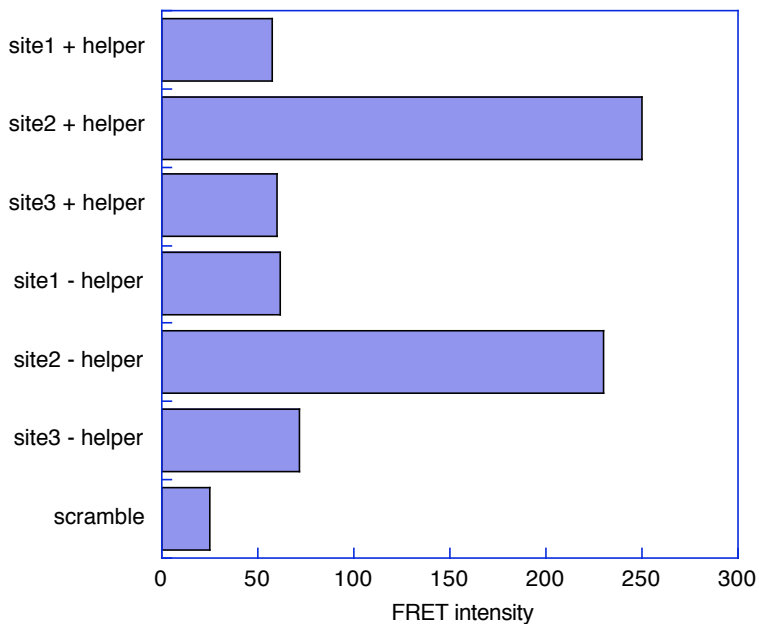

Supplement: pnas_0509938103_5.pdf [file pnas_0509938103_5.pdf]
