# Supplementary material
Source: PubMed Central journal article supplement (PMC1326184)

site1

site2

site3

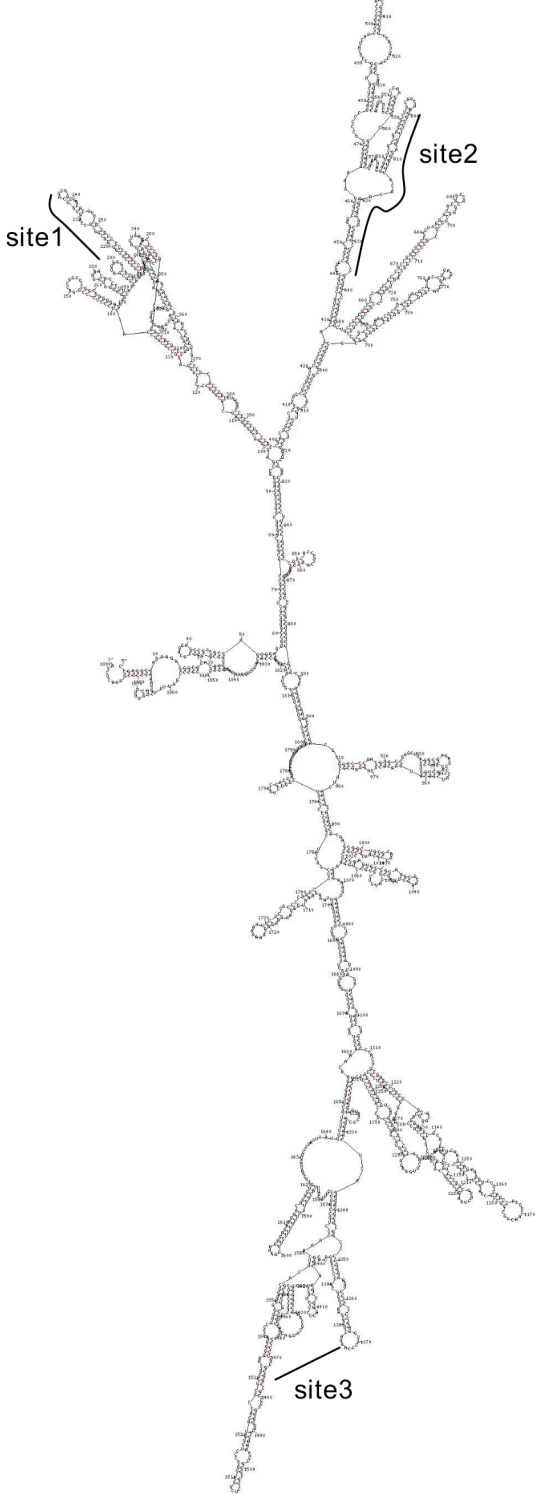

Supplement: pnas_0509938103_10.pdf [file pnas_0509938103_10.pdf]

**A**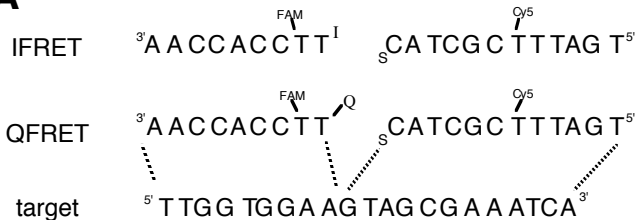**B**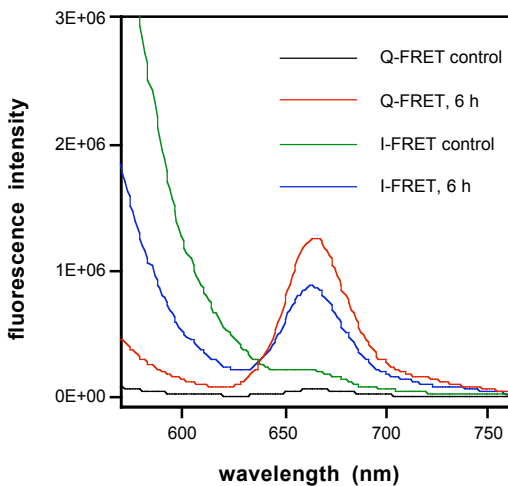

Supplement: pnas_0509938103_2.pdf [file pnas_0509938103_2.pdf]

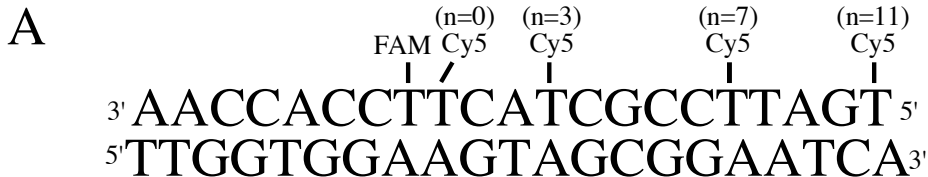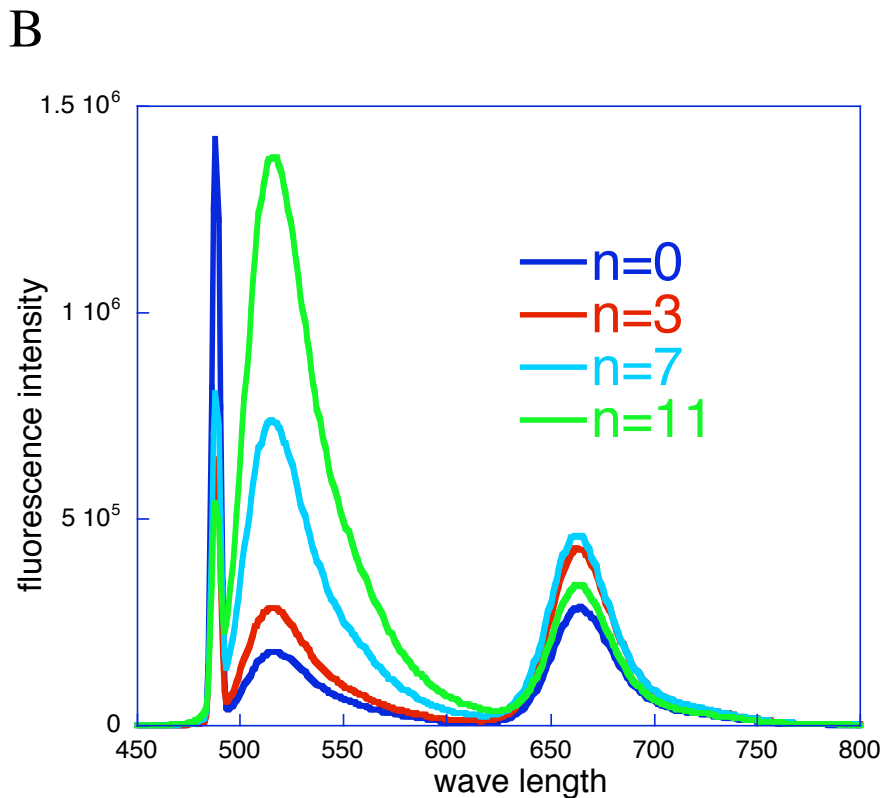

Supplement: pnas_0509938103_3.pdf [file pnas_0509938103_3.pdf]

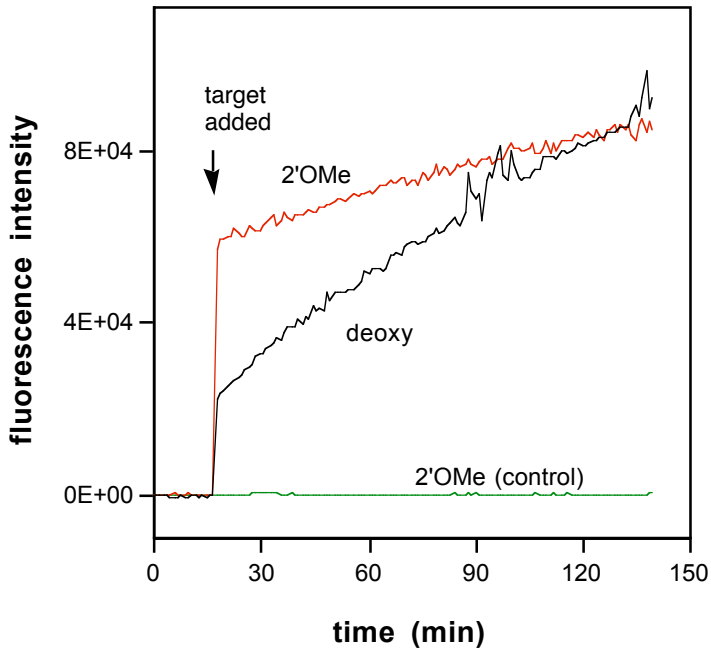

Supplement: pnas_0509938103_4.pdf [file pnas_0509938103_4.pdf]

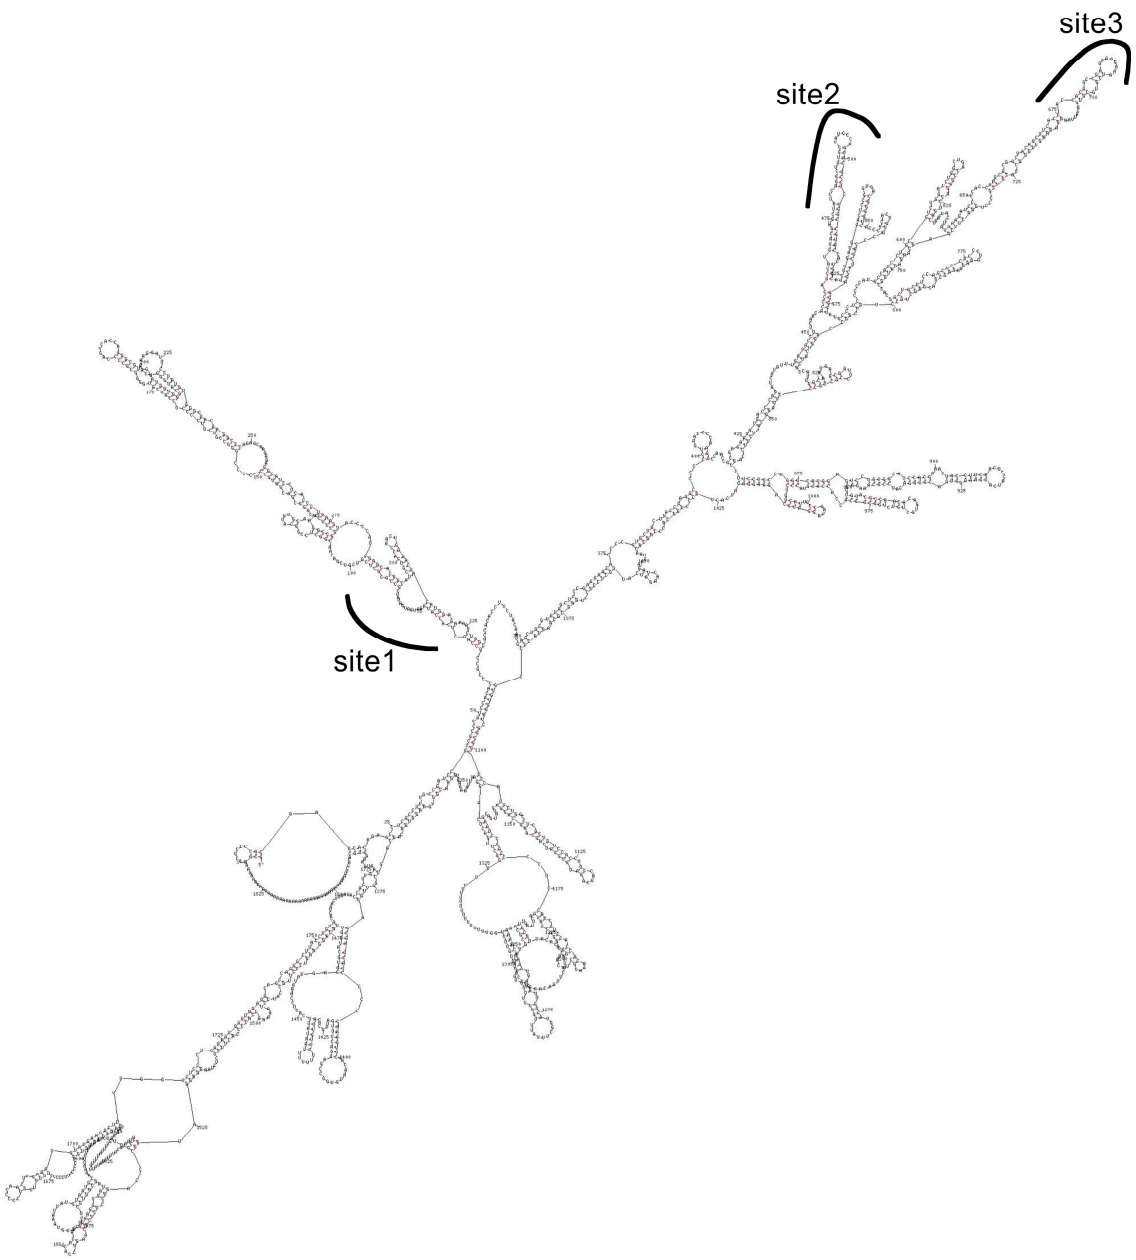

Supplement: pnas_0509938103_6.pdf [file pnas_0509938103_6.pdf]

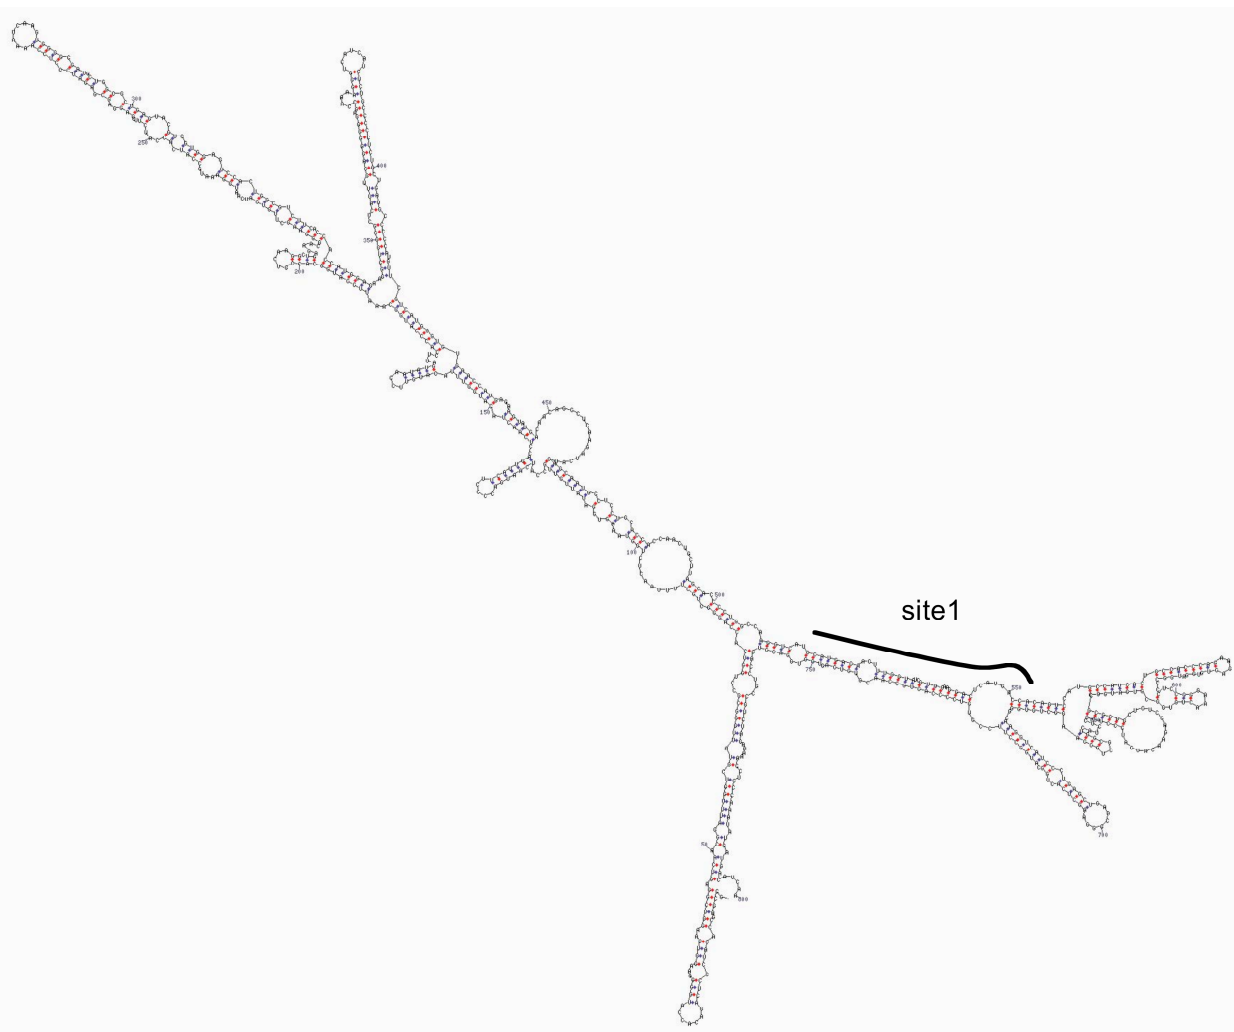

Supplement: pnas_0509938103_7.pdf [file pnas_0509938103_7.pdf]

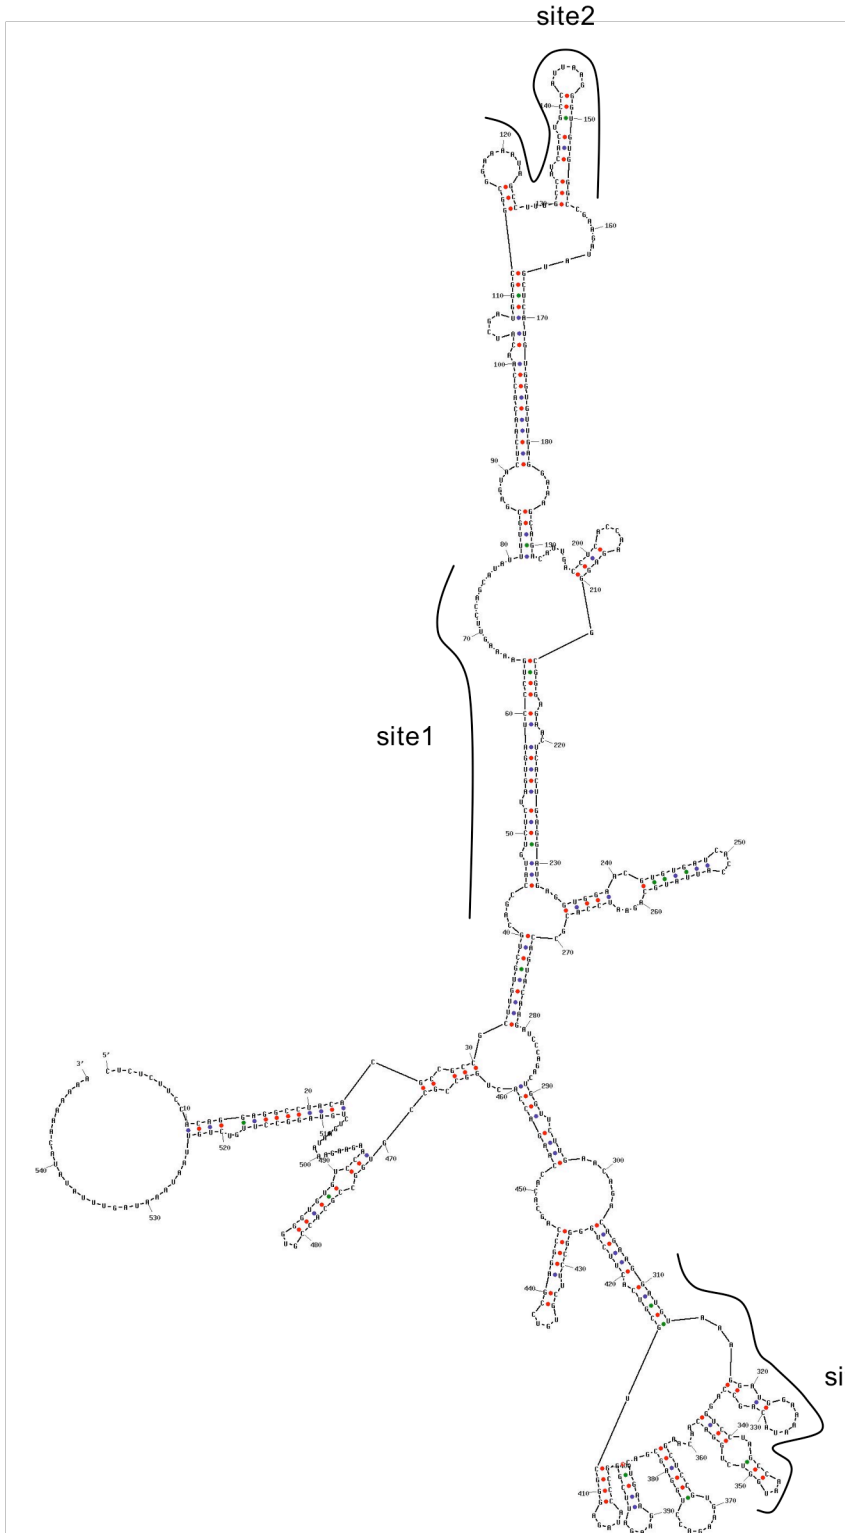

site1

site2

site3

Supplement: pnas_0509938103_8.pdf [file pnas_0509938103_8.pdf]

site2

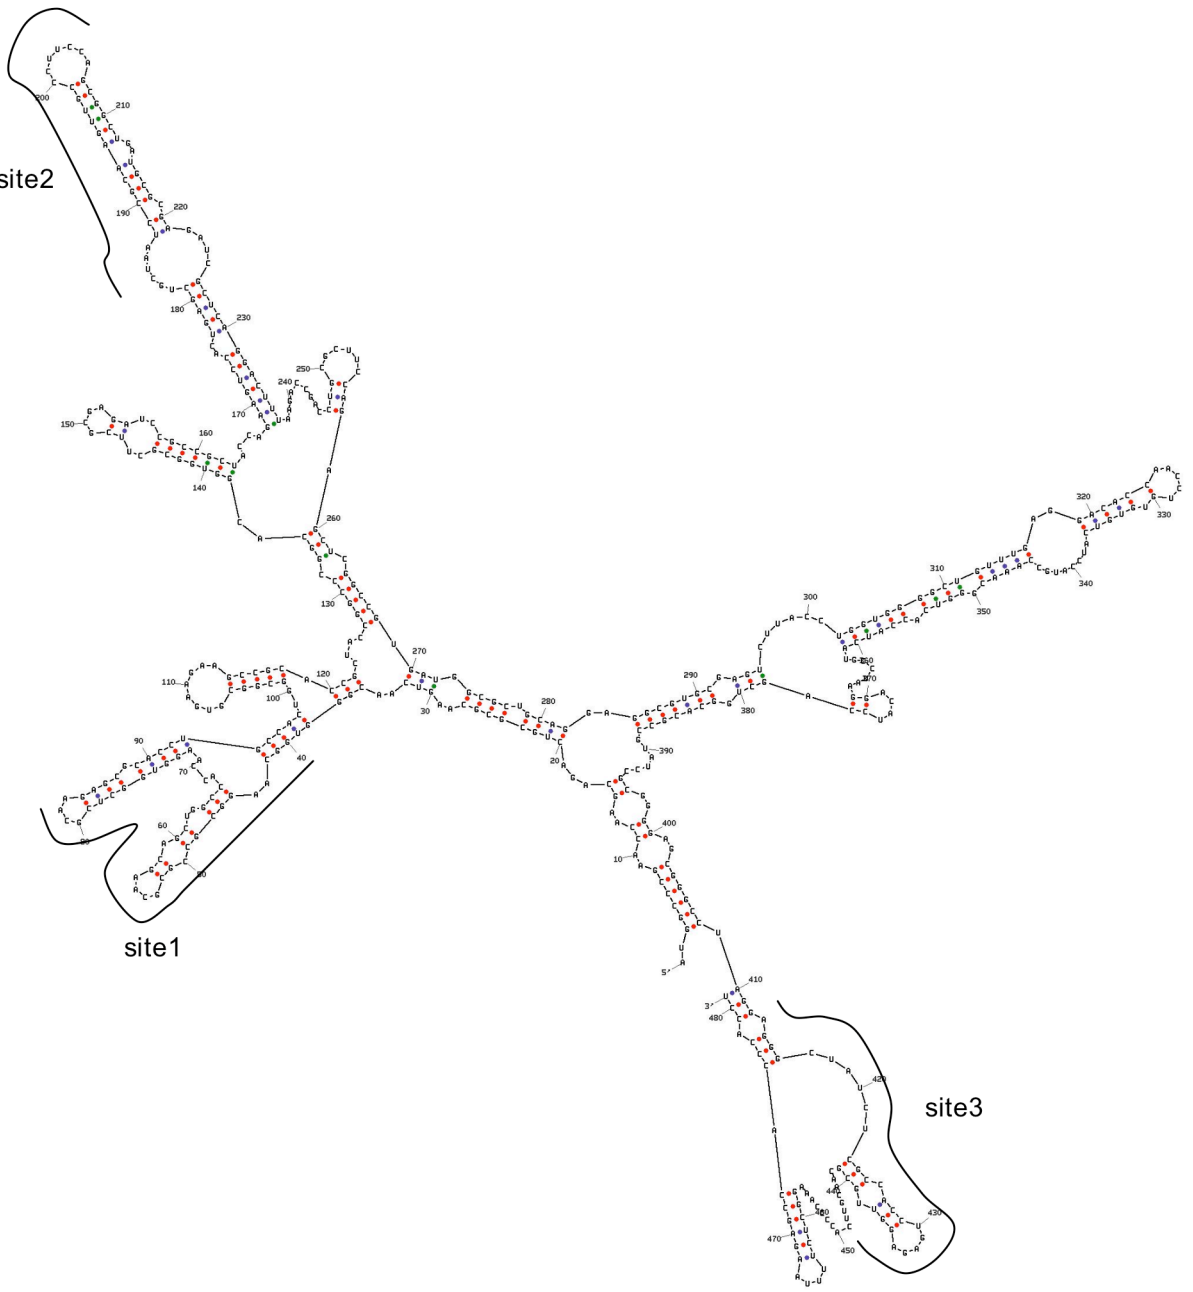

site1

site3

Supplement: pnas_0509938103_9.pdf [file pnas_0509938103_9.pdf]
